# Supplementary material for: Frankamenite: Relationship between the Crystal–Chemical and Vibrational Properties
Source: MDPI journal article supplement (doi:10.3390/min13081017), 2023-07-29
Supplement: s1 [file s1]

# Frankamenite: relationship between the crystal-chemical and vibrational properties

Ekaterina Kaneva <sup>1\*</sup>, Roman Shendrik <sup>1</sup>, Elizaveta Pankrushina <sup>2</sup>, Emilia Dokuchits <sup>3</sup>, Tatiana Radomskaya <sup>1</sup>, Mikhail Pechurin <sup>2</sup> and Aleksey Ushakov <sup>4</sup>

<sup>1</sup> Vinogradov Institute of Geochemistry, Siberian Branch of the Russian Academy of Sciences, Favorsky str. 1A, Irkutsk 664033, Russia

<sup>2</sup> Zavaritsky Institute of Geology and Geochemistry, Ural Branch of the Russian Academy of Sciences, Ak. Vonsovsky str. 15, Ekaterinburg, 620110, Russia;

<sup>3</sup> State Key Laboratory of Geological Processes and Mineral Resources, Collaborative Innovation Center for Exploration of Strategic Mineral Resources, School of Earth Resources, China University of Geosciences, Wuhan 430074, China

<sup>4</sup> Mikheev Institute of Metal Physics, Ural Branch of the Russian Academy of Sciences, S. Kovalevskaya str. 18, Ekaterinburg 620990, Russia

\* Correspondence: kev604@mail.ru

**Table S1.** Crystallographic coordinates, occupancies and equivalent/isotropic atomic displacement parameters ( $\text{\AA}^2$ ) of frankamenite sample.

| Site | Atom             | x/a       | y/b        | z/c        | Occ.      | Ueq    |
|------|------------------|-----------|------------|------------|-----------|--------|
| K1   | K <sup>+</sup>   | 0.0016(4) | 0.5001(3)  | 0.4992(7)  | 0.9579(9) | 0.0477 |
| K2   | K <sup>+</sup>   | 0.3128(3) | 0.4991(2)  | 0.1540(4)  | 0.9675(9) | 0.0204 |
| K3   | K <sup>+</sup>   | 0.6821(2) | 0.5025(3)  | 0.8382(4)  | 1.0432(9) | 0.0247 |
| M1   | Na <sup>+</sup>  | 0.0004(5) | 0.0002(3)  | −0.0009(6) | 0.7927(7) | 0.0302 |
|      | Ca <sup>2+</sup> | 0.0004(5) | 0.0002(3)  | −0.0009(6) | 0.2073(7) | 0.0302 |
| M2   | Ca <sup>2+</sup> | 0.0002(4) | 0.0003(3)  | 0.5006(5)  | 1         | 0.0156 |
| M3   | Ca <sup>2+</sup> | 0.5068(3) | 0.0062(4)  | 0.2531(3)  | 0.5783(7) | 0.0153 |
|      | Na <sup>+</sup>  | 0.5068(3) | 0.0062(4)  | 0.2531(3)  | 0.4217(7) | 0.0153 |
| M4   | Ca <sup>2+</sup> | 0.3284(3) | 0.1578(3)  | −0.0836(3) | 0.7821(7) | 0.0123 |
|      | Na <sup>+</sup>  | 0.3284(3) | 0.1578(3)  | −0.0836(3) | 0.2179(7) | 0.0123 |
| M5   | Ca <sup>2+</sup> | 0.6717(3) | 0.8430(4)  | 0.5855(3)  | 0.7564(7) | 0.0114 |
|      | Na <sup>+</sup>  | 0.6717(3) | 0.8430(4)  | 0.5855(3)  | 0.2436(7) | 0.0114 |
| M6   | Ca <sup>2+</sup> | 0.4921(3) | −0.0058(3) | 0.7459(3)  | 0.5835(7) | 0.0079 |
|      | Na <sup>+</sup>  | 0.4921(3) | −0.0058(3) | 0.7459(3)  | 0.4165(7) | 0.0079 |
| M7   | Ca <sup>2+</sup> | 0.3281(3) | 0.1585(4)  | 0.4099(3)  | 0.7764(7) | 0.0128 |
|      | Na <sup>+</sup>  | 0.3281(3) | 0.1585(4)  | 0.4099(3)  | 0.2236(7) | 0.0128 |
| M8   | Ca <sup>2+</sup> | 0.6720(3) | 0.8423(3)  | 0.0849(3)  | 0.7469(7) | 0.0117 |
|      | Na <sup>+</sup>  | 0.6720(3) | 0.8423(3)  | 0.0849(3)  | 0.2530(7) | 0.0117 |
| Si1  | Si <sup>4+</sup> | 0.0366(3) | 0.2467(3)  | 0.8010(4)  | 1         | 0.0081 |
| Si2  | Si <sup>4+</sup> | 0.2891(3) | 0.7515(2)  | 0.9284(4)  | 1         | 0.0044 |
| Si3  | Si <sup>4+</sup> | 0.2767(3) | 0.3682(2)  | 0.6375(4)  | 1         | 0.0044 |
| Si4  | Si <sup>4+</sup> | 0.4085(3) | 0.6306(2)  | 0.7047(4)  | 1         | 0.0077 |
| Si5  | Si <sup>4+</sup> | 0.0375(3) | 0.2469(3)  | 0.2339(4)  | 1         | 0.0098 |
| Si6  | Si <sup>4+</sup> | 0.2889(3) | 0.7517(3)  | 0.3575(4)  | 1         | 0.0079 |
| Si7  | Si <sup>4+</sup> | 0.9623(3) | 0.7534(3)  | 0.1956(4)  | 1         | 0.0078 |
| Si8  | Si <sup>4+</sup> | 0.7114(3) | 0.2480(3)  | 0.0671(4)  | 1         | 0.0103 |
| Si9  | Si <sup>4+</sup> | 0.7255(3) | 0.6329(3)  | 0.3622(4)  | 1         | 0.0101 |
| Si10 | Si <sup>4+</sup> | 0.5917(3) | 0.3678(2)  | 0.2963(4)  | 1         | 0.0084 |

|       |                  |            |           |            |            |        |
|-------|------------------|------------|-----------|------------|------------|--------|
| Si11  | Si <sup>4+</sup> | 0.9627(3)  | 0.7532(2) | 0.7648(4)  | 1          | 0.0067 |
| Si12  | Si <sup>4+</sup> | 0.7107(3)  | 0.2484(3) | 0.6405(4)  | 1          | 0.0073 |
| O1    | O <sup>2-</sup>  | 0.0590(6)  | 0.1336(6) | 0.7747(7)  | 1          | 0.0155 |
| O2    | O <sup>2-</sup>  | 0.1588(5)  | 0.3541(4) | 0.7580(6)  | 1          | 0.0123 |
| O3    | O <sup>2-</sup>  | 0.4196(6)  | 0.2861(5) | 0.2119(6)  | 1          | 0.0214 |
| O4    | O <sup>2-</sup>  | 0.3968(5)  | 0.5003(4) | 0.6970(6)  | 1          | 0.0038 |
| O5    | O <sup>2-</sup>  | 0.3132(5)  | 0.6466(5) | 0.8411(6)  | 1          | 0.0130 |
| O6    | O <sup>2-</sup>  | 0.1302(6)  | 0.7586(6) | 0.7829(6)  | 1          | 0.0217 |
| O7    | O <sup>2-</sup>  | 0.5663(6)  | 0.1342(6) | 0.0281(7)  | 1          | 0.0129 |
| O8    | O <sup>2-</sup>  | 0.6387(5)  | 0.7166(4) | 0.3190(6)  | 1          | 0.0097 |
| O9    | O <sup>2-</sup>  | 0.0580(6)  | 0.2856(6) | 0.0304(7)  | 1          | 0.0210 |
| O10   | O <sup>2-</sup>  | 0.2638(5)  | 0.7086(4) | 0.1290(6)  | 1          | 0.0077 |
| O11   | O <sup>2-</sup>  | 0.0582(6)  | 0.1363(6) | 0.2831(7)  | 1          | 0.0235 |
| O12   | O <sup>2-</sup>  | 0.1630(5)  | 0.3567(5) | 0.3968(6)  | 1          | 0.0117 |
| O13   | O <sup>2-</sup>  | 0.3130(5)  | 0.6460(5) | 0.4735(6)  | 1          | 0.0146 |
| O14   | O <sup>2-</sup>  | 0.1283(6)  | 0.7580(5) | 0.3514(6)  | 1          | 0.0198 |
| O15   | O <sup>2-</sup>  | 0.5668(6)  | 0.1309(5) | 0.5385(6)  | 1          | 0.0108 |
| O16   | O <sup>2-</sup>  | -0.0643(6) | 0.8665(5) | 0.2231(7)  | 1          | 0.0128 |
| O17   | O <sup>2-</sup>  | 0.8277(5)  | 0.6414(4) | 0.2319(6)  | 1          | 0.0092 |
| O18   | O <sup>2-</sup>  | 0.5809(5)  | 0.7131(5) | 0.7933(6)  | 1          | 0.0129 |
| O19   | O <sup>2-</sup>  | 0.6081(6)  | 0.5014(6) | 0.3040(7)  | 1          | 0.0181 |
| O20   | O <sup>2-</sup>  | 0.6949(5)  | 0.3594(4) | 0.1724(6)  | 1          | 0.0131 |
| O21   | O <sup>2-</sup>  | 0.8725(5)  | 0.2446(5) | 0.2244(6)  | 1          | 0.0113 |
| O22   | O <sup>2-</sup>  | 0.4361(6)  | 0.8657(5) | 0.9747(6)  | 1          | 0.0080 |
| O23   | O <sup>2-</sup>  | 0.3687(5)  | 0.2861(5) | 0.6848(7)  | 1          | 0.0175 |
| O24   | O <sup>2-</sup>  | -0.0529(5) | 0.7146(4) | 0.9741(5)  | 1          | 0.0043 |
| O25   | O <sup>2-</sup>  | 0.7356(6)  | 0.2921(6) | 0.8648(7)  | 1          | 0.0181 |
| O26   | O <sup>2-</sup>  | -0.0636(5) | 0.8687(4) | 0.7131(6)  | 1          | 0.0059 |
| O27   | O <sup>2-</sup>  | 0.8325(6)  | 0.6439(4) | 0.5933(6)  | 1          | 0.0118 |
| O28   | O <sup>2-</sup>  | 0.6950(5)  | 0.3591(4) | 0.5231(6)  | 1          | 0.0133 |
| O29   | O <sup>2-</sup>  | 0.8704(5)  | 0.2442(5) | 0.6519(6)  | 1          | 0.0135 |
| O30   | O <sup>2-</sup>  | 0.4367(5)  | 0.8622(4) | 0.4597(6)  | 1          | 0.0082 |
| (OH)1 | O <sup>2-</sup>  | 0.2647(7)  | 0.0311(5) | 0.6303(7)  | 1          | 0.0154 |
| (OH)2 | O <sup>2-</sup>  | 0.7404(6)  | 0.9709(5) | 0.3684(6)  | 1          | 0.0133 |
| F1    | F <sup>-</sup>   | 0.2748(6)  | 0.0356(4) | 0.1373(6)  | 1          | 0.0203 |
| F2    | F <sup>-</sup>   | 0.7255(6)  | 0.9680(5) | 0.8626(6)  | 1          | 0.0257 |
| Ow    | O <sup>2-</sup>  | 0.0036(7)  | 0.5003(5) | -0.0622(7) | 0.6442(10) | 0.0331 |

**Table S2.** Selected bond distances (Å) for tetrahedra and polyhedra of the studied frankamenite sample.

| Distance | Å                | Distance | Å                | Distance | Å                |
|----------|------------------|----------|------------------|----------|------------------|
| Si1–O1   | 1.551(10)        | Si2–O5   | 1.602(8)         | Si3–O23  | 1.583(8)         |
| Si1–O2   | 1.609(6)         | Si2–O22  | 1.603(6)         | Si3–O4   | 1.639(5)         |
| Si1–O29  | 1.626(6)         | Si2–O6   | 1.605(7)         | Si3–O2   | 1.675(7)         |
| Si1–O9   | 1.648(7)         | Si2–O10  | 1.624(6)         | Si3–O12  | 1.679(5)         |
| <Si1–O>  | <b>1.608(15)</b> | <Si2–O>  | <b>1.609(14)</b> | <Si3–O>  | <b>1.644(13)</b> |
| Si4–O18  | 1.573(5)         | Si5–O11  | 1.513(9)         | Si6–O30  | 1.582(5)         |
| Si4–O4   | 1.617(6)         | Si5–O9   | 1.612(7)         | Si6–O13  | 1.625(8)         |
| Si4–O13  | 1.654(5)         | Si5–O12  | 1.626(6)         | Si6–O14  | 1.635(8)         |
| Si4–O5   | 1.661(7)         | Si5–O21  | 1.632(7)         | Si6–O10  | 1.644(6)         |

---

|          |           |          |           |          |           |
|----------|-----------|----------|-----------|----------|-----------|
| <Si4-O>  | 1.626(12) | <Si5-O>  | 1.596(15) | <Si6-O>  | 1.621(14) |
| Si7-O16  | 1.576(9)  | Si8-O7   | 1.597(7)  | Si9-O8   | 1.562(7)  |
| Si7-O24  | 1.614(5)  | Si8-O21  | 1.631(6)  | Si9-O27  | 1.606(5)  |
| Si7-O14  | 1.630(6)  | Si8-O25  | 1.636(7)  | Si9-O17  | 1.608(7)  |
| Si7-O17  | 1.690(6)  | Si8-O20  | 1.692(7)  | Si9-O19  | 1.625(7)  |
| <Si7-O>  | 1.628(13) | <Si8-O>  | 1.639(14) | <Si9-O>  | 1.601(13) |
| Si10-O3  | 1.568(6)  | Si11-O26 | 1.599(7)  | Si12-O29 | 1.604(7)  |
| Si10-O28 | 1.626(5)  | Si11-O6  | 1.625(8)  | Si12-O15 | 1.616(6)  |
| Si10-O20 | 1.627(7)  | Si11-O24 | 1.635(6)  | Si12-O25 | 1.617(7)  |
| Si10-O19 | 1.645(9)  | Si11-O27 | 1.662(5)  | Si12-O28 | 1.666(7)  |
| <Si10-O> | 1.616(14) | <Si11-O> | 1.630(13) | <Si12-O> | 1.626(14) |
| M1-O26   | 2.405(7)  | M2-(OH)2 | 2.335(7)  | M3-F1    | 2.349(8)  |
| M1-O1    | 2.418(8)  | M2-O26   | 2.352(7)  | M3-O15   | 2.362(7)  |
| M1-O16   | 2.433(8)  | M2-O1    | 2.369(8)  | M3-O7    | 2.382(8)  |
| M1-O11   | 2.448(8)  | M2-(OH)1 | 2.375(7)  | M3-(OH)2 | 2.403(8)  |
| M1-F1    | 2.454(8)  | M2-O16   | 2.374(7)  | M3-O22   | 2.417(7)  |
| M1-F2    | 2.468(8)  | M2-O11   | 2.399(8)  | M3-O30   | 2.436(7)  |
| <M1-O,F> | 2.438(19) | <M2-O>   | 2.368(18) | <M3-O,F> | 2.392(18) |
| M4-F1    | 2.300(6)  | M5-O30   | 2.316(7)  | M6-F2    | 2.342(8)  |
| M4-O7    | 2.369(8)  | M5-F2    | 2.336(7)  | M6-(OH)1 | 2.356(8)  |
| M4-(OH)1 | 2.370(7)  | M5-(OH)2 | 2.363(7)  | M6-O15   | 2.395(7)  |
| M4-O3    | 2.372(6)  | M5-O8    | 2.362(6)  | M6-O22   | 2.398(7)  |
| M4-O23   | 2.377(7)  | M5-O26   | 2.392(6)  | M6-O7    | 2.424(7)  |
| M4-O1    | 2.441(7)  | M5-O18   | 2.400(6)  | M6-O30   | 2.436(6)  |
| <M4-O,F> | 2.372(17) | <M5-O,F> | 2.362(16) | <M6-O,F> | 2.392(18) |
| M7-F1    | 2.297(6)  | M8-F2    | 2.334(7)  |          |           |
| M7-O3    | 2.332(7)  | M8-O22   | 2.349(8)  |          |           |
| M7-(OH)1 | 2.362(7)  | M8-(OH)2 | 2.357(7)  |          |           |
| M-O23    | 2.389(7)  | M8-O18   | 2.357(6)  |          |           |
| M7-O15   | 2.401(8)  | M8-O8    | 2.358(6)  |          |           |
| M7-O11   | 2.453(7)  | M8-O16   | 2.388(7)  |          |           |
| <M7-O,F> | 2.373(17) | <M8-O,F> | 2.357(14) |          |           |
| K1-O20   | 3.048(5)  | K2-O19   | 2.771(7)  | K3-O4    | 2.677(5)  |
| K1-O2    | 3.059(7)  | K2-O10   | 2.863(7)  | K3-O25   | 2.896(9)  |
| K1-O28   | 3.060(7)  | K2-O9    | 2.879(6)  | K3-O24   | 2.916(5)  |
| K1-O12   | 3.072(9)  | K2-O5    | 2.937(6)  | K3-O17   | 2.931(5)  |
| K1-O27   | 3.115(9)  | K2-Ow    | 2.952(8)  | K3-O27   | 2.951(6)  |
| K1-O13   | 3.120(7)  | K2-O12   | 2.941(6)  | K3-O28   | 2.985(7)  |
| K1-O17   | 3.126(7)  | K2-O13   | 2.970(7)  | K3-O20   | 3.016(6)  |
| K1-O5    | 3.137(5)  | K2-O2    | 2.974(5)  | K3-Ow    | 3.071(8)  |
| K1-Ow    | 3.166(8)  | K2-O3    | 3.216(8)  | K3-O18   | 3.154(8)  |
| <K1-O>   | 3.100(22) | K2-O8    | 3.282(5)  | K3-O23   | 3.202(5)  |
|          |           | <K2-O>   | 2.978(20) | <K3-O>   | 2.980(21) |

---

**Table S3.** Selected angles (°) for tetrahedra and polyhedra of the studied frankamenite sample.

| Angle        | °            | Angle        | °            | Angle        | °            |
|--------------|--------------|--------------|--------------|--------------|--------------|
| O1–Si1–O2    | 113.7(3)     | O5–Si2–O6    | 109.6(3)     | O2–Si3–O4    | 106.9(3)     |
| O1–Si1–O9    | 113.8(4)     | O5–Si2–O10   | 101.3(3)     | O2–Si3–O12   | 103.2(3)     |
| O1–Si1–O29   | 113.0(4)     | O5–Si2–O22   | 110.8(3)     | O2–Si3–O23   | 115.4(3)     |
| O2–Si1–O9    | 103.0(3)     | O6–Si2–O10   | 106.1(3)     | O4–Si3–O12   | 105.3(3)     |
| O2–Si1–O29   | 105.1(3)     | O6–Si2–O22   | 115.1(3)     | O4–Si3–O23   | 109.6(3)     |
| O9–Si1–O29   | 107.3(3)     | O10–Si2–O22  | 113.0(3)     | O12–Si3–O23  | 115.7(3)     |
| <O–Si1–O>    | <b>109.3</b> | <O–Si2–O>    | <b>109.3</b> | <O–Si3–O>    | <b>109.4</b> |
| O4–Si4–O5    | 107.3(3)     | O9–Si5–O11   | 114.7(4)     | O10–Si6–O13  | 102.2(3)     |
| O4–Si4–O13   | 106.2(3)     | O9–Si5–O12   | 101.5(3)     | O10–Si6–O14  | 107.9(3)     |
| O4–Si4–O18   | 110.1(3)     | O9–Si5–O21   | 108.8(3)     | O10–Si6–O30  | 112.9(3)     |
| O5–Si4–O13   | 106.7(3)     | O11–Si5–O12  | 114.2(4)     | O13–Si6–O14  | 107.6(3)     |
| O5–Si4–O18   | 112.4(3)     | O11–Si5–O21  | 111.9(4)     | O13–Si6–O30  | 109.0(3)     |
| O13–Si4–O18  | 113.7(3)     | O12–Si5–O21  | 104.8(3)     | O14–Si6–O30  | 116.1(3)     |
| <O–Si4–O>    | <b>109.4</b> | <O–Si5–O>    | <b>109.3</b> | <O–Si6–O>    | <b>109.3</b> |
| O14–Si7–O16  | 112.4(4)     | O7–Si8–O20   | 111.7(3)     | O8–Si9–O17   | 114.0(3)     |
| O14–Si7–O17  | 107.3(3)     | O7–Si8–O21   | 114.7(4)     | O8–Si9–O19   | 111.7(3)     |
| O14–Si7–O24  | 107.2(3)     | O7–Si8–O25   | 114.7(4)     | O8–Si9–O27   | 114.1(3)     |
| O16–Si7–O17  | 111.1(3)     | O20–Si8–O21  | 103.4(3)     | O17–Si9–O19  | 103.5(3)     |
| O16–Si7–O24  | 115.6(3)     | O20–Si8–O25  | 102.7(3)     | O17–Si9–O27  | 107.8(3)     |
| O17–Si7–O24  | 102.4(4)     | O21–Si8–O25  | 108.5(3)     | O19–Si9–O27  | 104.7(3)     |
| <O–Si7–O>    | <b>109.3</b> | <O–Si8–O>    | <b>109.3</b> | <O–Si9–O>    | <b>109.3</b> |
| O3–Si10–O19  | 111.2(3)     | O6–Si11–O24  | 105.8(3)     | O15–Si12–O25 | 114.2(4)     |
| O3–Si10–O20  | 117.3(3)     | O6–Si11–O26  | 112.8(3)     | O15–Si12–O28 | 114.1(3)     |
| O3–Si10–O28  | 116.6(3)     | O6–Si11–O27  | 107.7(3)     | O15–Si12–O29 | 113.8(3)     |
| O19–Si10–O20 | 103.7(3)     | O24–Si11–O26 | 114.5(3)     | O25–Si12–O28 | 102.0(3)     |
| O19–Si10–O28 | 104.0(3)     | O24–Si11–O27 | 103.8(3)     | O25–Si12–O29 | 106.6(3)     |
| O20–Si10–O28 | 102.5(3)     | O26–Si11–O27 | 111.6(3)     | O28–Si12–O29 | 105.0(3)     |
| <O–Si10–O>   | <b>109.2</b> | <O–Si11–O>   | <b>109.4</b> | <O–Si12–O>   | <b>109.3</b> |
| F1–M1–O1     | 85.5(2)      | OH(1)–M2–O1  | 86.3(2)      | F1–M3–O7     | 83.7(2)      |
| F1–M1–O11    | 85.7(2)      | OH(1)–M2–O11 | 86.0(2)      | F1–M3–O15    | 84.2(2)      |
| F1–M1–O16    | 95.8(2)      | OH(1)–M2–O16 | 95.0(2)      | F1–M3–O22    | 95.7(2)      |
| F1–M1–O26    | 96.0(2)      | OH(1)–M2–O26 | 95.7(2)      | F1–M3–O30    | 96.2(2)      |
| F2–M1–O1     | 94.1(3)      | OH(2)–M2–O1  | 94.2(2)      | (OH)2–M3–O7  | 97.1(2)      |
| F2–M1–O11    | 93.4(2)      | OH(2)–M2–O11 | 93.2(2)      | (OH)2–M3–O15 | 96.9(2)      |
| F2–M1–O16    | 84.6(2)      | OH(2)–M2–O16 | 84.6(2)      | (OH)2–M3–O22 | 83.1(2)      |
| F2–M1–O26    | 84.8(2)      | OH(2)–M2–O26 | 85.1(2)      | (OH)2–M3–O30 | 82.9(2)      |
| O1–M1–O11    | 98.3(3)      | O1–M2–O11    | 96.4(3)      | O7–M3–O22    | 82.6(2)      |
| O11–M1–O16   | 81.4(2)      | O11–M2–O16   | 83.6(2)      | O22–M3–O30   | 92.5(2)      |
| O16–M1–O26   | 99.5(2)      | O16–M2–O26   | 97.1(2)      | O15–M3–O30   | 82.7(2)      |
| O1–M1–O26    | 80.8(2)      | O1–M2–O26    | 82.9(2)      | O7–M3–O15    | 102.2(2)     |
| <O,F–M1–O>   | <b>90.0</b>  | <O–M2–O>     | <b>90.0</b>  | <O,F–M3–O>   | <b>90.0</b>  |
| F1–M4–O1     | 88.4(2)      | F2–M5–O18    | 78.9(2)      | F2–M6–O7     | 94.2(2)      |
| F1–M4–O3     | 78.6(2)      | F2–M5–O26    | 88.1(2)      | F2–M6–O15    | 93.6(2)      |
| F1–M4–O7     | 85.1(2)      | F2–M5–O30    | 85.6(2)      | F2–M6–O22    | 83.4(2)      |

|              |             |              |             |              |             |
|--------------|-------------|--------------|-------------|--------------|-------------|
| F1–M4–(OH)1  | 102.1(2)    | F2–M5–(OH)2  | 101.2(2)    | F2–M6–O30    | 82.8(2)     |
| O1–M4–O23    | 88.0(2)     | O8–M5–O18    | 101.2(2)    | (OH)1–M6–O7  | 83.9(2)     |
| O3–M4–O23    | 100.8(2)    | O8–M5–26     | 87.1(2)     | (OH)1–M6–O15 | 84.1(2)     |
| O7–M4–O23    | 98.7(2)     | O8–M5–O30    | 99.3(2)     | (OH)1–M6–O22 | 98.7(2)     |
| O23–M4–(OH)1 | 78.8(2)     | O8–M5–(OH)2  | 79.1(2)     | (OH)1–M6–O30 | 98.9(2)     |
| O1–M4–O3     | 101.4(2)    | O18–M5–O26   | 101.2(2)    | O7–M6–O15    | 94.7(2)     |
| O3–M4–O7     | 89.2(2)     | O18–M5–O30   | 88.9(2)     | O15–M6–O30   | 82.0(2)     |
| O7–M4–(OH)1  | 84.8(2)     | O30–M5–(OH)2 | 86.4(2)     | O22–M6–O30   | 100.9(2)    |
| O1–M4–(OH)1  | 84.8(2)     | O26–M5–(OH)2 | 83.6(2)     | O7–M6–O22    | 82.1(2)     |
| < O,F–M4–O > | <b>90.1</b> | < O,F–M5–O > | <b>90.1</b> | < O,F–M6–O > | <b>89.9</b> |
|              |             |              |             |              |             |
| F1–M7–O3     | 79.5(2)     | F2–M8–O16    | 88.6(2)     |              |             |
| F1–M7–O11    | 89.1(2)     | F2–M8–O18    | 79.8(2)     |              |             |
| F1–M7–O15    | 84.4(2)     | F2–M8–O22    | 84.7(2)     |              |             |
| F1–M7–(OH)1  | 101.4(2)    | F2–M8–(OH)2  | 100.5(2)    |              |             |
| O23–M7–O3    | 100.8(2)    | O8–M8–O16    | 86.8(2)     |              |             |
| O23–M7–O11   | 87.6(2)     | O8–M8–O18    | 100.8(2)    |              |             |
| O23–M7–O15   | 98.9(2)     | O8–M8–O22    | 99.9(2)     |              |             |
| O23–M7–(OH)1 | 78.8(2)     | O8–M8–(OH)2  | 79.3(2)     |              |             |
| O3–M7–O11    | 101.5(2)    | O18–M8–O22   | 89.4(2)     |              |             |
| O3–M7–O15    | 89.8(2)     | O16–M8–O18   | 101.4(2)    |              |             |
| O11–M7–(OH)1 | 85.1(2)     | O16–M8–(OH)2 | 83.8(2)     |              |             |
| O15–M7–(OH)1 | 83.8(2)     | O22–M8–(OH)2 | 85.5(2)     |              |             |
| < O,F–M7–O > | <b>90.1</b> | < O,F–M8–O > | <b>90.0</b> |              |             |

**Table S4.** Bond-valence sum (BVS) and coordination number (CN) of the cation and anion structural positions for the studied frankamenite. CN for Si = 4.

| Site | BVS  | CN | Site | BVS  | Site | BVS  | CN | Site  | BVS  | CN |
|------|------|----|------|------|------|------|----|-------|------|----|
| K1   | 0.64 | 9  | Si1  | 4.18 | O1   | 1.98 | 4  | O18   | 1.77 | 4  |
| K2   | 1.02 | 10 | Si2  | 4.16 | O2   | 2.09 | 4  | O19   | 2.10 | 3  |
| K3   | 1.02 | 10 | Si3  | 3.82 | O3   | 1.83 | 4  | O20   | 2.00 | 4  |
| M1*  | 1.06 | 6  | Si4  | 3.99 | O4   | 2.18 | 3  | O21   | 1.96 | 2  |
| M2   | 1.95 | 6  | Si5  | 4.34 | O5   | 2.13 | 4  | O22   | 1.85 | 4  |
| M3*  | 1.48 | 6  | Si6  | 4.03 | O6   | 2.04 | 2  | O23   | 1.74 | 4  |
| M4*  | 1.67 | 6  | Si7  | 3.99 | O7   | 1.87 | 4  | O24   | 2.11 | 3  |
| M5*  | 1.72 | 6  | Si8  | 3.86 | O8   | 1.81 | 4  | O25   | 2.06 | 3  |
| M6*  | 1.47 | 6  | Si9  | 4.25 | O9   | 2.09 | 3  | O26   | 1.89 | 4  |
| M7*  | 1.69 | 6  | Si10 | 4.09 | O10  | 2.07 | 3  | O27   | 2.12 | 4  |
| M8*  | 1.69 | 6  | Si11 | 3.94 | O11  | 2.05 | 4  | O28   | 2.06 | 4  |
|      |      |    | Si12 | 3.99 | O12  | 2.05 | 4  | O29   | 2.04 | 2  |
|      |      |    |      |      | O13  | 2.08 | 4  | O30   | 1.91 | 4  |
|      |      |    |      |      | O14  | 1.96 | 2  | (OH)1 | 0.90 | 3  |
|      |      |    |      |      | O15  | 1.83 | 4  | (OH)2 | 1.49 | 5  |
|      |      |    |      |      | O16  | 1.92 | 4  | F1    | 0.89 | 4  |
|      |      |    |      |      | O17  | 2.06 | 4  | F2    | 0.82 | 4  |
|      |      |    |      |      |      |      |    | Ow**  | 0.24 | 3  |

\* BVSs for M1 and M3–M8 sites with mixed occupancy were calculated using the fractional site occupancies (see Table S1);

\*\* Without taking into account the contribution of H atoms

**Table S5.** Crystallographic coordinates of the simulated structural model of frankamenite.

| Site | Atom             | x/a       | y/b       | z/c      |
|------|------------------|-----------|-----------|----------|
| K1   | K <sup>+</sup>   | 0.001150  | 0.508820  | 0.530240 |
| K2   | K <sup>+</sup>   | 0.324368  | 0.502186  | 0.155529 |
| K3   | K <sup>+</sup>   | 0.700773  | 0.506016  | 0.845151 |
| M1   | Na <sup>+</sup>  | −0.013119 | −0.003140 | 0.993343 |
| M2   | Ca <sup>2+</sup> | −0.007685 | −0.000602 | 0.487532 |
| M3   | Ca <sup>2+</sup> | 0.504939  | −0.000669 | 0.247326 |
| M4   | Ca <sup>2+</sup> | 0.326218  | 0.151224  | 0.908313 |
| M5   | Ca <sup>2+</sup> | 0.673142  | 0.843992  | 0.592115 |
| M6   | Na <sup>+</sup>  | 0.512866  | −0.005952 | 0.759894 |
| M7   | Ca <sup>2+</sup> | 0.325746  | 0.151698  | 0.410118 |
| M8   | Na <sup>+</sup>  | 0.672066  | 0.842449  | 0.074010 |
| Si1  | Si <sup>4+</sup> | 0.036441  | 0.246140  | 0.798756 |
| Si2  | Si <sup>4+</sup> | 0.291952  | 0.750733  | 0.930299 |
| Si3  | Si <sup>4+</sup> | 0.277444  | 0.367220  | 0.634304 |
| Si4  | Si <sup>4+</sup> | 0.413581  | 0.630205  | 0.703741 |
| Si5  | Si <sup>4+</sup> | 0.037712  | 0.249220  | 0.230857 |
| Si6  | Si <sup>4+</sup> | 0.285579  | 0.747365  | 0.355802 |
| Si7  | Si <sup>4+</sup> | 0.961941  | 0.756751  | 0.196052 |
| Si8  | Si <sup>4+</sup> | 0.709203  | 0.246601  | 0.069228 |
| Si9  | Si <sup>4+</sup> | 0.721178  | 0.635379  | 0.358063 |
| Si10 | Si <sup>4+</sup> | 0.590440  | 0.368632  | 0.290962 |
| Si11 | Si <sup>4+</sup> | 0.966190  | 0.756166  | 0.761404 |
| Si12 | Si <sup>4+</sup> | 0.706412  | 0.243657  | 0.633371 |
| O1   | O <sup>2−</sup>  | 0.070250  | 0.133303  | 0.785117 |
| O2   | O <sup>2−</sup>  | 0.163047  | 0.357263  | 0.756050 |
| O3   | O <sup>2−</sup>  | 0.416204  | 0.282991  | 0.203884 |
| O4   | O <sup>2−</sup>  | 0.403286  | 0.497301  | 0.702373 |
| O5   | O <sup>2−</sup>  | 0.313495  | 0.641441  | 0.836162 |
| O6   | O <sup>2−</sup>  | 0.131797  | 0.757317  | 0.770506 |
| O7   | O <sup>2−</sup>  | 0.565082  | 0.133054  | 0.036854 |
| O8   | O <sup>2−</sup>  | 0.630242  | 0.718237  | 0.319618 |
| O9   | O <sup>2−</sup>  | 0.051210  | 0.292710  | 0.020764 |
| O10  | O <sup>2−</sup>  | 0.252186  | 0.700001  | 0.123957 |
| O11  | O <sup>2−</sup>  | 0.069607  | 0.135553  | 0.278554 |
| O12  | O <sup>2−</sup>  | 0.169854  | 0.360636  | 0.396226 |
| O13  | O <sup>2−</sup>  | 0.305658  | 0.637468  | 0.471334 |
| O14  | O <sup>2−</sup>  | 0.126760  | 0.755508  | 0.354087 |
| O15  | O <sup>2−</sup>  | 0.561454  | 0.130469  | 0.523365 |
| O16  | O <sup>2−</sup>  | 0.937524  | 0.871940  | 0.223719 |
| O17  | O <sup>2−</sup>  | 0.829938  | 0.644509  | 0.228261 |
| O18  | O <sup>2−</sup>  | 0.586121  | 0.713716  | 0.782978 |
| O19  | O <sup>2−</sup>  | 0.602511  | 0.500946  | 0.300867 |
| O20  | O <sup>2−</sup>  | 0.690000  | 0.358981  | 0.157359 |
| O21  | O <sup>2−</sup>  | 0.872517  | 0.244698  | 0.225492 |
| O22  | O <sup>2−</sup>  | 0.434148  | 0.866673  | 0.981588 |
| O23  | O <sup>2−</sup>  | 0.359388  | 0.277451  | 0.676237 |
| O24  | O <sup>2−</sup>  | 0.949608  | 0.720477  | 0.971451 |
| O25  | O <sup>2−</sup>  | 0.730116  | 0.282457  | 0.861461 |
| O26  | O <sup>2−</sup>  | 0.937052  | 0.870215  | 0.706634 |

|       |                 |           |          |          |
|-------|-----------------|-----------|----------|----------|
| O27   | O <sup>2-</sup> | 0.835895  | 0.644617 | 0.594681 |
| O28   | O <sup>2-</sup> | 0.690854  | 0.355465 | 0.521914 |
| O29   | O <sup>2-</sup> | 0.866270  | 0.233898 | 0.639241 |
| O30   | O <sup>2-</sup> | 0.430979  | 0.862445 | 0.449406 |
| (OH)1 | O <sup>2-</sup> | 0.256404  | 0.024167 | 0.624736 |
| H1    | H               | 0.233731  | 0.942781 | 0.612315 |
| (OH)2 | O <sup>2-</sup> | 0.744835  | 0.992634 | 0.406716 |
| H2    | H               | 0.782451  | 0.067861 | 0.483047 |
| F1    | F <sup>-</sup>  | 0.274215  | 0.031184 | 0.134051 |
| F2    | F <sup>-</sup>  | 0.735739  | 0.969701 | 0.858630 |
| Ow    | O <sup>2-</sup> | -0.009990 | 0.500052 | 0.923521 |
| Hw1   | H               | 0.072287  | 0.568112 | 0.011886 |
| Hw2   | H               | 0.003138  | 0.432378 | 0.979645 |

**Table S6.** Calculated geometrical and distortion parameters for polyhedra in the simulated structure model of frankamenite: ECoN - effective coordination number [1–3], Vp - volume of the coordination polyhedron [4,5], r – average distance from the cation to the ligands, r<sub>v</sub> – average distance from the volume center to the ligands [4,5], Δ<sub>v</sub> – distance of the central atom to the volume center [4,5], r<sub>s</sub> – average distance from the centroid to the ligands [4,5], Δ – distance of the central atom to the centroid [4,5], V<sub>s</sub> – volume of the sphere fitted to the positions of ligands [4,5], ECC<sub>v</sub> – volume eccentricity [4,5], SPH<sub>v</sub> – volume sphericity [4,5], BLD – bond length distortion [3, 6], A – average ligand–central atom–ligand angle, TAV – tetrahedral angle variance [3,7], TQE – tetrahedral quadratic elongation [3,7], OAV – octahedral angle variance [3,7], OQE – octahedral quadratic elongation [3,7], D% – deviation from the experimental values.

|                                  | Si1    | D%   | Si2    | D%   | Si3    | D%   | Si4    | D%   | Si5    | D%   | Si6    | D%   |
|----------------------------------|--------|------|--------|------|--------|------|--------|------|--------|------|--------|------|
| ECoN                             | 3.962  | 1.16 | 3.944  | 1.30 | 3.961  | 1.41 | 3.918  | 0.15 | 3.962  | 3.63 | 3.963  | 0.08 |
| Vp (Å <sup>3</sup> )             | 2.228  | 5.14 | 2.231  | 5.38 | 2.239  | 0.97 | 2.239  | 1.77 | 2.225  | 7.59 | 2.235  | 3.00 |
| r (Å)                            | 1.636  | 1.74 | 1.639  | 1.86 | 1.638  | 0.36 | 1.640  | 0.86 | 1.636  | 2.51 | 1.638  | 1.05 |
| r <sub>v</sub> (Å)               | 1.635  |      | 1.636  |      | 1.636  |      | 1.637  |      | 1.634  |      | 1.636  |      |
| Δ <sub>v</sub> (Å)               | 0.042  |      | 0.049  |      | 0.043  |      | 0.059  |      | 0.042  |      | 0.042  |      |
| r <sub>s</sub> (Å)               | 1.633  |      | 1.634  |      | 1.635  |      | 0.1635 |      | 1.632  |      | 1.634  |      |
| Δ (Å)                            | 0.100  |      | 0.119  |      | 0.093  |      | 0.116  |      | 0.110  |      | 0.105  |      |
| V <sub>s</sub> (Å <sup>3</sup> ) | 18.291 | 5.35 | 18.342 | 5.27 | 18.351 | 1.09 | 18.374 | 2.14 | 18.273 | 7.86 | 18.342 | 2.94 |
| ECC <sub>v</sub>                 | 0.0750 |      | 0.0878 |      | 0.0759 |      | 0.1037 |      | 0.0755 |      | 0.0745 |      |
| SPH <sub>v</sub>                 | 1.0000 |      | 0.9999 |      | 1.0000 |      | 1.0000 |      | 1.0000 |      | 0.9999 |      |
| BLD (%)                          | 1.29   |      | 1.56   |      | 1.28   |      | 1.86   |      | 1.28   |      | 1.26   |      |
| A (°)                            | 109.3  | 0    | 109.3  | 0    | 109.3  | 0.09 | 109.3  | 0.09 | 109.3  | 0    | 109.3  | 0    |
| TAV                              | 27.724 |      | 37.097 |      | 21.237 |      | 32.840 |      | 30.730 |      | 27.952 |      |
| TQE                              | 1.006  |      | 1.008  |      | 1.005  |      | 1.007  |      | 1.007  |      | 1.006  |      |
|                                  | Si7    | D%   | Si8    | D%   | Si9    | D%   | Si10   | D%   | Si11   | D%   | Si12   | D%   |
| ECoN                             | 3.951  | 1.28 | 3.970  | 0.89 | 3.931  | 0.91 | 3.966  | 0.48 | 3.967  | 0.13 | 3.969  | 0.03 |
| Vp (Å <sup>3</sup> )             | 2.227  | 1.37 | 2.219  | 0.89 | 2.245  | 7.42 | 2.241  | 4.87 | 2.226  | 0.68 | 2.222  | 1.79 |
| r (Å)                            | 1.636  | 0.49 | 1.633  | 0.37 | 1.641  | 2.50 | 1.638  | 1.36 | 1.635  | 0.31 | 1.633  | 0.43 |
| r <sub>v</sub> (Å)               | 1.629  |      | 1.632  |      | 1.639  |      | 1.637  |      | 1.637  |      | 1.632  |      |
| Δ <sub>v</sub> (Å)               | 0.050  |      | 0.039  |      | 0.054  |      | 0.040  |      | 0.043  |      | 0.040  |      |
| r <sub>s</sub> (Å)               | 1.627  |      | 1.630  |      | 1.637  |      | 1.635  |      | 1.636  |      | 1.631  |      |
| Δ (Å)                            | 0.107  |      | 0.098  |      | 0.122  |      | 0.093  |      | 0.096  |      | 0.084  |      |
| V <sub>s</sub> (Å <sup>3</sup> ) | 18.109 | 0.71 | 18.193 | 0.92 | 18.431 | 7.65 | 18.369 | 4.39 | 18.392 | 1.53 | 18.199 | 1.18 |
| ECC <sub>v</sub>                 | 0.0886 |      | 0.0694 |      | 0.0961 |      | 0.0712 |      | 0.0760 |      | 0.0710 |      |
| SPH <sub>v</sub>                 | 0.9999 |      | 1.0000 |      | 0.9999 |      | 1.0000 |      | 0.9999 |      | 1.0000 |      |
| BLD (%)                          | 1.43   |      | 1.08   |      | 1.73   |      | 1.22   |      | 1.15   |      | 1.18   |      |

| A (°)                            | 109.3  | 0    | 109.3  | 0     | 109.3  | 0    | 109.3   | 0.09  | 109.3   | 0.09  | 109.4   | 0.09  |
|----------------------------------|--------|------|--------|-------|--------|------|---------|-------|---------|-------|---------|-------|
| TAV                              | 27.010 |      | 23.115 |       | 34.789 |      | 21.064  |       | 21.201  |       | 18.320  |       |
| TQE                              | 1.006  |      | 1.005  |       | 1.008  |      | 1.005   |       | 1.005   |       | 1.004   |       |
|                                  | M1     | D%   | M2     | D%    | M3     | D%   | M4      | D%    | M5      | D%    | M6      | D%    |
| ECoN                             | 5.599  | 6.42 | 5.858  | 2.11  | 5.961  | 0.07 | 5.971   | 0.71  | 5.892   | 1.24  | 5.316   | 10.74 |
| Vp (Å <sup>3</sup> )             | 18.092 | 4.34 | 17.302 | 0.80  | 16.782 | 5.65 | 16.727  | 2.89  | 16.835  | 1.10  | 18.875  | 6.22  |
| r (Å)                            | 2.409  | 1.19 | 2.366  | 0.08  | 2.339  | 2.22 | 2.347   | 1.05  | 2.342   | 0.85  | 2.445   | 2.22  |
| r <sub>v</sub> (Å)               | 2.406  |      | 2.364  |       | 2.338  |      | 2.348   |       | 2.341   |       | 2.441   |       |
| Δ <sub>v</sub> (Å)               | 0.160  |      | 0.099  |       | 0.046  |      | 0.041   |       | 0.060   |       | 0.179   |       |
| r <sub>s</sub> (Å)               | 2.405  |      | 2.363  |       | 2.337  |      | 2.346   |       | 2.337   |       | 2.441   |       |
| Δ (Å)                            | 0.153  |      | 0.127  |       | 0.092  |      | 0.055   |       | 0.134   |       | 0.176   |       |
| V <sub>s</sub> (Å <sup>3</sup> ) | 58.342 | 3.85 | 55.352 | 0.46  | 53.521 | 6.52 | 54.251  | 3.07  | 53.762  | 2.69  | 60.918  | 6.25  |
| ECC <sub>v</sub>                 | 0.1862 |      | 0.1209 |       | 0.0577 |      | 0.0510  |       | 0.0751  |       | 0.2041  |       |
| SPH <sub>v</sub>                 | 0.9835 |      | 0.9853 |       | 0.9807 |      | 0.9761  |       | 0.9555  |       | 0.9661  |       |
| BLD (%)                          | 2.66   |      | 2.10   |       | 1.16   |      | 0.79    |       | 1.84    |       | 3.25    |       |
| A (°)                            | 89.9   | 0.11 | 90.0   | 0     | 90.0   | 0    | 90.1    | 0     | 90.0    | 0.11  | 89.9    | 0     |
| OAV                              | 66.013 |      | 48.239 |       | 38.066 |      | 71.563  |       | 38.804  |       | 70.952  |       |
| OQE                              | 1.021  |      | 1.014  |       | 1.011  |      | 1.021   |       | 1.012   |       | 1.023   |       |
|                                  | M7     | D%   | M8     | D%    |        |      | K1      | D%    | K2      | D%    | K3      | D%    |
| ECoN                             | 5.968  | 1.27 | 5.365  | 10.43 |        |      | 9.179   | 2.59  | 7.987   | 11.42 | 8.433   | 2.52  |
| Vp (Å <sup>3</sup> )             | 16.723 | 3.04 | 18.806 | 10.99 |        |      | 56.245  | 14.78 | 49.907  | 0.36  | 42.757  | 15.32 |
| r (Å)                            | 2.347  | 1.10 | 2.446  | 3.78  |        |      | 3.092   | 0.26  | 2.974   | 0.13  | 2.917   | 2.11  |
| r <sub>v</sub> (Å)               | 2.348  |      | 2.441  |       |        |      | 3.115   |       | 2.970   |       | 2.924   |       |
| Δ <sub>v</sub> (Å)               | 0.040  |      | 0.211  |       |        |      | 0.202   |       | 0.052   |       | 0.068   |       |
| r <sub>s</sub> (Å)               | 2.346  |      | 2.440  |       |        |      | 3.069   |       | 2.953   |       | 2.880   |       |
| Δ (Å)                            | 0.058  |      | 0.204  |       |        |      | 0.296   |       | 0.318   |       | 0.398   |       |
| V <sub>s</sub> (Å <sup>3</sup> ) | 54.255 | 3.09 | 60.895 | 10.94 |        |      | 126.623 | 1.71  | 109.774 | 1.64  | 104.703 | 5.53  |
| ECC <sub>v</sub>                 | 0.0501 |      | 0.2374 |       |        |      | 0.1825  |       | 0.0520  |       | 0.0683  |       |
| SPH <sub>v</sub>                 | 0.9729 |      | 0.8760 |       |        |      | 0.9239  |       | 0.8280  |       | 0.8748  |       |
| BLD (%)                          | 0.83   |      | 4.58   |       |        |      | 3.64    |       | 4.27    |       | 3.00    |       |
| A (°)                            | 90.1   | 0    | 90.0   | 0     |        |      | —       |       | —       |       | —       |       |
| OAV                              | 71.432 |      | 79.023 |       |        |      | —       |       | —       |       | —       |       |
| OQE                              | 1.021  |      | 1.029  |       |        |      | —       |       | —       |       | —       |       |

- Hoppe, R.; Voigt, S.; Glaum, H.; Kissel, J.; Müller, H.P.; Bernet, K. A new route to charge distributions in ionic solids. *J. Less-Common. Met.* **1989**, *156*, 105–122. [[https://doi.org/10.1016/0022-5088\(89\)90411-6](https://doi.org/10.1016/0022-5088(89)90411-6)]
- Nespolo, M.; Ferraris, G.; Ohashi, H. Charge distribution as a tool to investigate structural details: meaning and application to pyroxenes. *Acta Crystallogr.* **1999**, *B55*, 902–916. [[doi.org/10.1107/S0108768199008708](https://doi.org/10.1107/S0108768199008708)]
- Momma, K.; Izumi, F. VESTA 3 for three-dimensional visualization of crystal, volumetric and morphology data. *J. Appl. Crystallogr.* **2011**, *44*, 1272–1276. [<https://doi.org/10.1107/S0021889811038970>]
- Balić-Žunić, T.; Makovicky, E. Determination of the centroid or ‘the best centre’ of a coordination polyhedron. *Acta Crystallogr.* **1996**, *B52*, 78–81. [<https://doi.org/10.1107/S0108768195008251>]
- Balić-Žunić, T.; Vicković, I. IVTON – program for the calculation of geometrical aspects of crystal structures and some crystal chemical applications. *J. Appl. Cryst.* **1996**, *29*, 305–306. [<https://doi.org/10.1107/S0021889895015081>]
- Renner, B.; Lehmann, G. Correlation of angular and bond length distortions in TO<sub>4</sub> units in crystals. *Z. für Kristallogr.* **1986**, *175*, 43–59 (1986). [<https://doi.org/10.1524/zkri.1986.175.1-2.43>]
- Robinson, K.; Gibbs, G.V.; Ribbe, P.H. Quadratic elongation: A quantitative measure of distortion in coordination polyhedra. *Science*. **1971**, *172*, 567–570. [DOI:10.1126/science.172.3983.567]
